# Supplementary material for: Solution structure of the YTH domain in complex with N6-methyladenosine RNA: a reader of methylated RNA
Source: PubMed Central journal article supplement (PMC4267619; doi:10.1093/nar/gku1116), 2014-11-11
Supplement: supp_gku1116_nar-02765-r-2014-File006.pdf [file supp_gku1116_nar-02765-r-2014-File006.pdf]

**Supplementary Information:**

## **Solution structure of the YTH domain in complex with N<sup>6</sup>-methyladenosine RNA: a reader of methylated RNA**

Dominik Theler<sup>1</sup>, Cyril Dominguez<sup>1,2</sup>, Markus Blatter<sup>1</sup>, Julien Boudet<sup>1</sup> and Frédéric H-T Allain<sup>1,\*</sup>

<sup>1</sup> Institute of Molecular Biology and Biophysics, Eidgenössische Technische Hochschule (ETH) Zurich, 8093 Zurich, Switzerland

<sup>2</sup> Present address: Department of Biochemistry, Henry Wellcome Laboratories of Structural Biology, University of Leicester, LE1 9HN Leicester, UK

\* Correspondence: [allain@mol.biol.ethz.ch](mailto:allain@mol.biol.ethz.ch)

### **Supplementary Results:**

Supplementary Figure 1: Modified SIA approach, ITC thermodynamic parameters and NMR titration spectra.

Supplementary Figure 2: Structural comparison of the free and bound state of the domain and intermolecular NOEs to the N6 methyl group.

Supplementary Figure 3: Full alignment and UniProt Entries

**Supplementary Figure1: Modified SIA approach, ITC Thermodynamic Parameters and NMR titration spectra**

**A**

|               |             |               |             |               |             |               |             |               |             |               |             |
|---------------|-------------|---------------|-------------|---------------|-------------|---------------|-------------|---------------|-------------|---------------|-------------|
| AGACAC        | 0.83        | UAACNC        | 0.57        | <b>UNACNC</b> | <b>1.00</b> | UNNANC        | 0.83        | <b>UGACAC</b> | <b>0.99</b> | UGACAA        | 0.95        |
| CGACAC        | 0.76        | UCACNC        | 0.56        | UNCCNC        | 0.17        | <b>UNNCNC</b> | <b>1.00</b> | <b>UGACCC</b> | <b>0.95</b> | UGACAC        | <b>1.00</b> |
| <b>GGACAC</b> | <b>1.00</b> | <b>UGACNC</b> | <b>1.00</b> | UNGANC        | 0.16        | UNNGNC        | 0.81        | UGACGC        | 0.86        | <b>UGACAG</b> | <b>0.95</b> |
| <b>UGACAC</b> | <b>0.90</b> | UUACNC        | 0.43        | UNUCNC        | 0.37        | UNNUCNC       | 0.84        | <b>UGACUC</b> | <b>1.00</b> | <b>UGACAU</b> | <b>0.96</b> |
| Position 1    |             | Position 2    |             | Position 3    |             | Position 4    |             | Position 5    |             | Position 6    |             |

**B**

| Ligand (Syringe)            | Receptor (Cell) | Kd ( $\mu\text{M}$ ) | $\Delta\text{H}$ (kcal.mol <sup>-1</sup> ) | $\Delta\text{S}$ (cal.mol <sup>-1</sup> .deg <sup>-1</sup> ) | N value     |
|-----------------------------|-----------------|----------------------|--------------------------------------------|--------------------------------------------------------------|-------------|
| 5'-UGACAC-3'                | YTH             | 5.35 ± 0.18          | -2.23 ± 0.37                               | 15.6                                                         | 1.08 ± 0.01 |
| 5'-UGm <sup>6</sup> ACAC-3' | YTH             | 0.103 ± 0.003        | -14.4 ± 0.4                                | -17.2                                                        | 1.02 ± 0.01 |

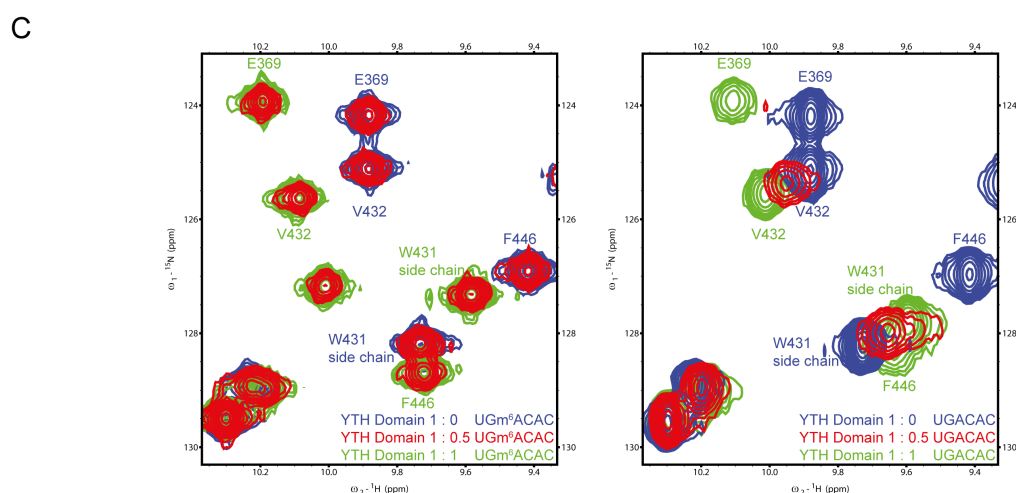

- A)** Results of the modified SIA approach (32) (Supplemental experimental procedures). 24 oligonucleotide sequences are tested for binding to the YTH domain. N indicates that the oligonucleotide is synthesized with a phosphoramidite pool containing all four bases equally populated. For each position, the oligonucleotides used and the obtained scores are shown. The chemical shift difference is normalized to the chemical shift difference of the oligonucleotide showing the largest amplitude. Note that position 4 was assayed first, followed by position 3, 2, 5, 6 and 1. For each position, the oligonucleotides with scores higher than 0.95 are marked in bold. Note that except for position 2 and 3 that show a clear preference for G and A, respectively, all other positions show only a weak sequence-selectivity in agreement with the structure of the complex. Individual nucleotides at the position assessed are colored. Individual oligonucleotides as well as the positions of the hexanucleotide are written left to right in the 5' to 3' direction.
- B)** Thermodynamic parameters ( $K$ ,  $\Delta\text{H}$ ,  $\Delta\text{S}$  and  $N$ ) with respective errors from the ITC runs.
- C)** Overlay of a selected region of <sup>1</sup>H-<sup>15</sup>N HSQC spectra of titrations of the YTH domain of YT521-B with 5'-UGm<sup>6</sup>ACAC-3' (left) and 5'-UGACAC-3' (right). The molar protein to RNA ratios of the titrations points are indicated. Both titrations were recorded at a magnetic field strength of 500 MHz.

**Supplementary Figure 2: Structural comparison of the free and bound state of the domain and Intermolecular NOEs to the N6 methyl group.**

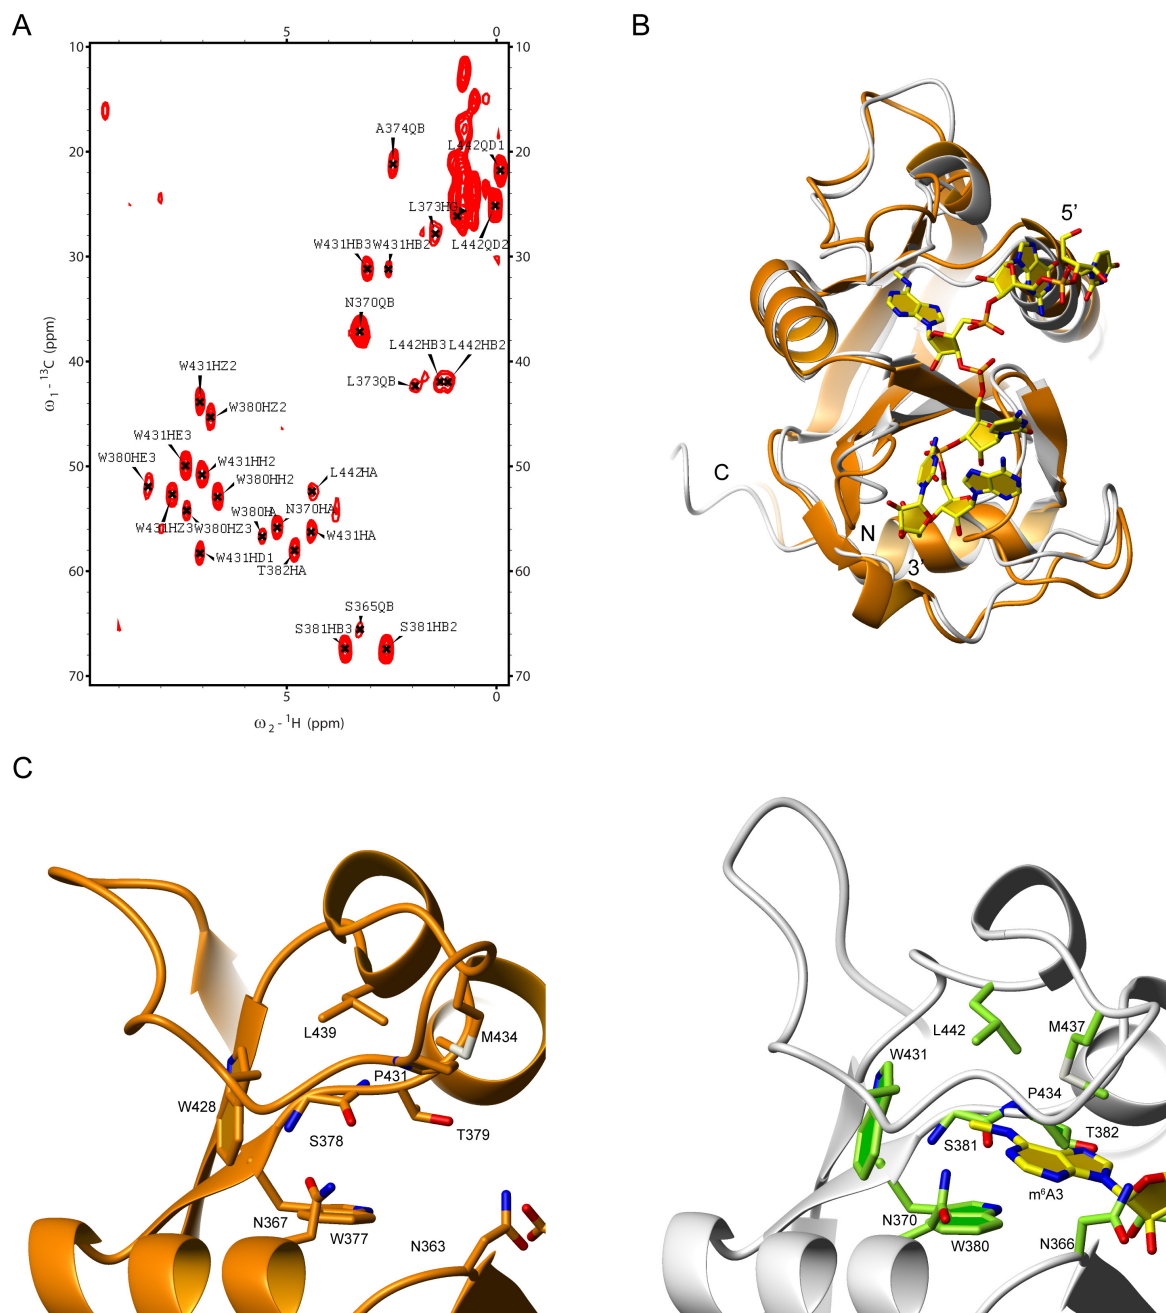

- A) 2D  $^1\text{H}$ - $^{13}\text{C}$  HSQC plane ( $\omega_3$  -  $^1\text{H}$  = 0.68 ppm) of the 3D  $^{13}\text{C}$  F1-edited F3-filtered NOESY  $^1\text{H}$ - $^{13}\text{C}$  HSQC, which contains the intermolecular NOEs observed to the N6 methyl in this spectrum. Peaks are labeled with the protein proton assignment ( $\omega_2$ ). The intermolecular NOE to W341 HH2 was not included in the structure calculation as a restraint. This intermolecular NOE is in agreement with the solved structure.
- B) Structural comparison of the YT521-B 5'-UGm<sup>6</sup>ACAC-3' complex structure with the solution structure of a homologous human YTH domain (PDB ID 2YUD, YTHDC1) displayed as an orange ribbon.
- C) Structural comparison of the methyl binding pocket in the free (left) and bound state (right). Coloring as in B) and Figure 2. Carbon atoms of the free domain are displayed in orange.

**Figure S3: Full Alignment and UniProt Entries**

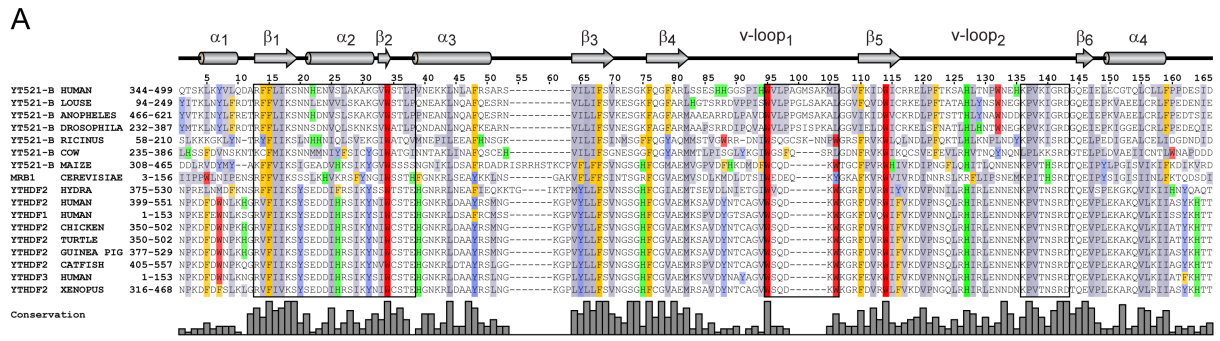

- A) Sequence alignment of a representative selection of YTH domain containing proteins. Boxes indicate the regions shown in Figure 3A. Hydrophobic residues are colored grey, aromatic residues (F, Y, H, W) yellow, blue, green and red respectively. Top: Secondary structure representation; first to sixth  $\beta$ -strand, first to fourth  $\alpha$ -helix and the two variable loops. Bottom: Conservation bars.
- B) UniProt entries used in the sequence alignment.
